# Supplementary material
Source: PubMed Central journal article supplement (PMC4767649)

# Supplementary Figure 6

## Figure 1e

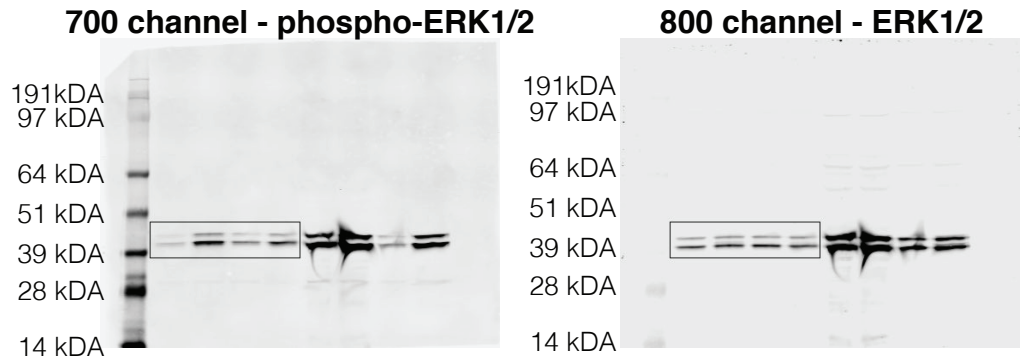

## Figure 4a

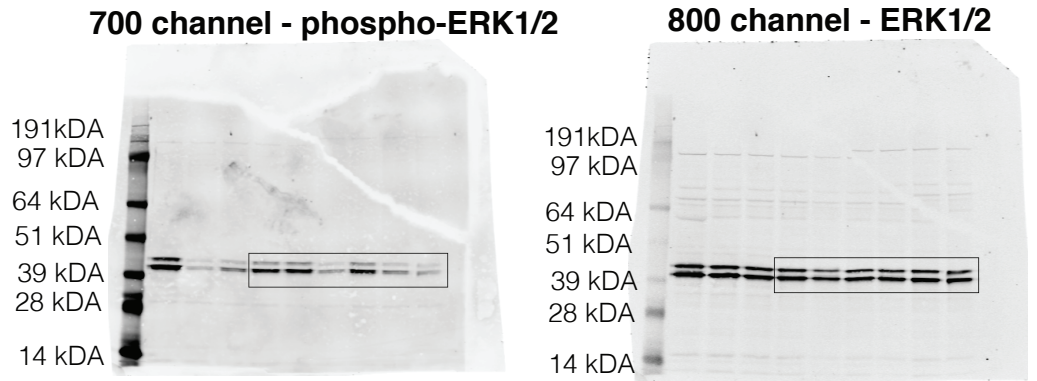

## Figure 4d

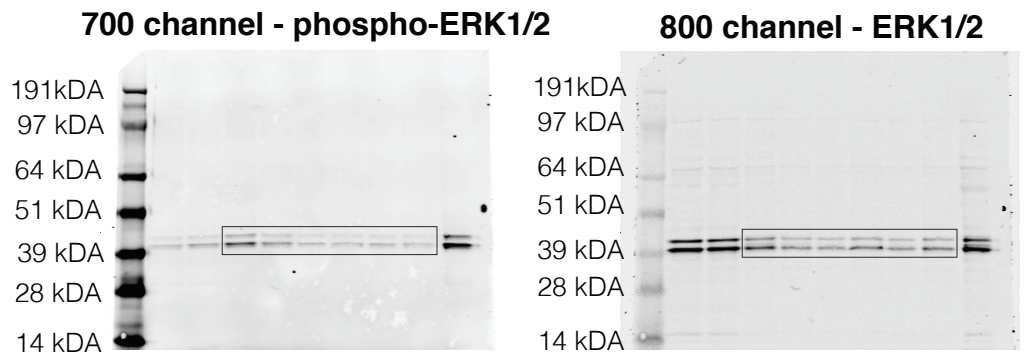

## Supplementary Figure 1b

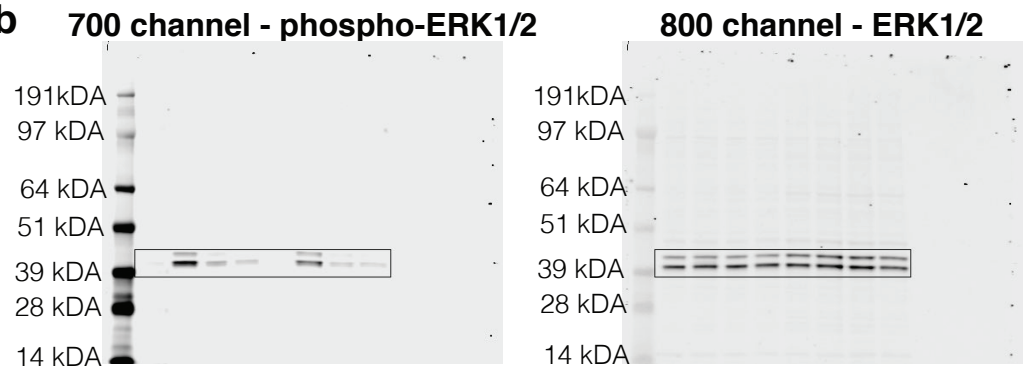

## Supplementary Figure 5c

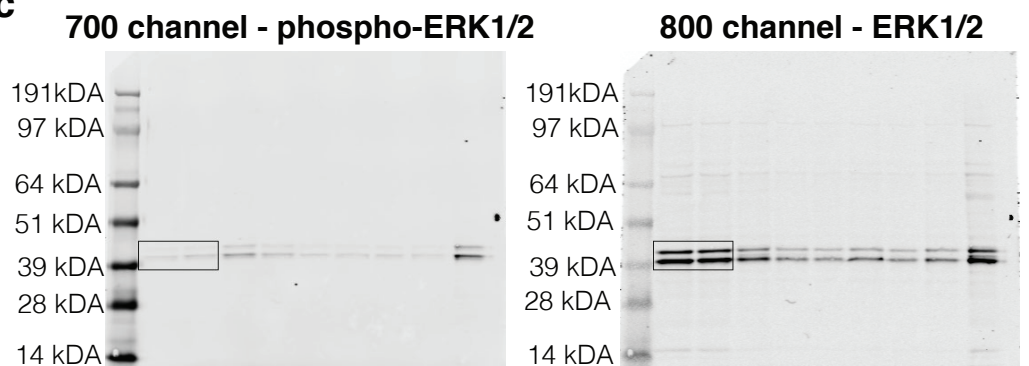

Supplement: NIHMS749198-supplement-7.pdf [file NIHMS749198-supplement-7.pdf]
