# Supplementary material
Source: PubMed Central journal article supplement (PMC4767649)

# Supplementary Figure 1

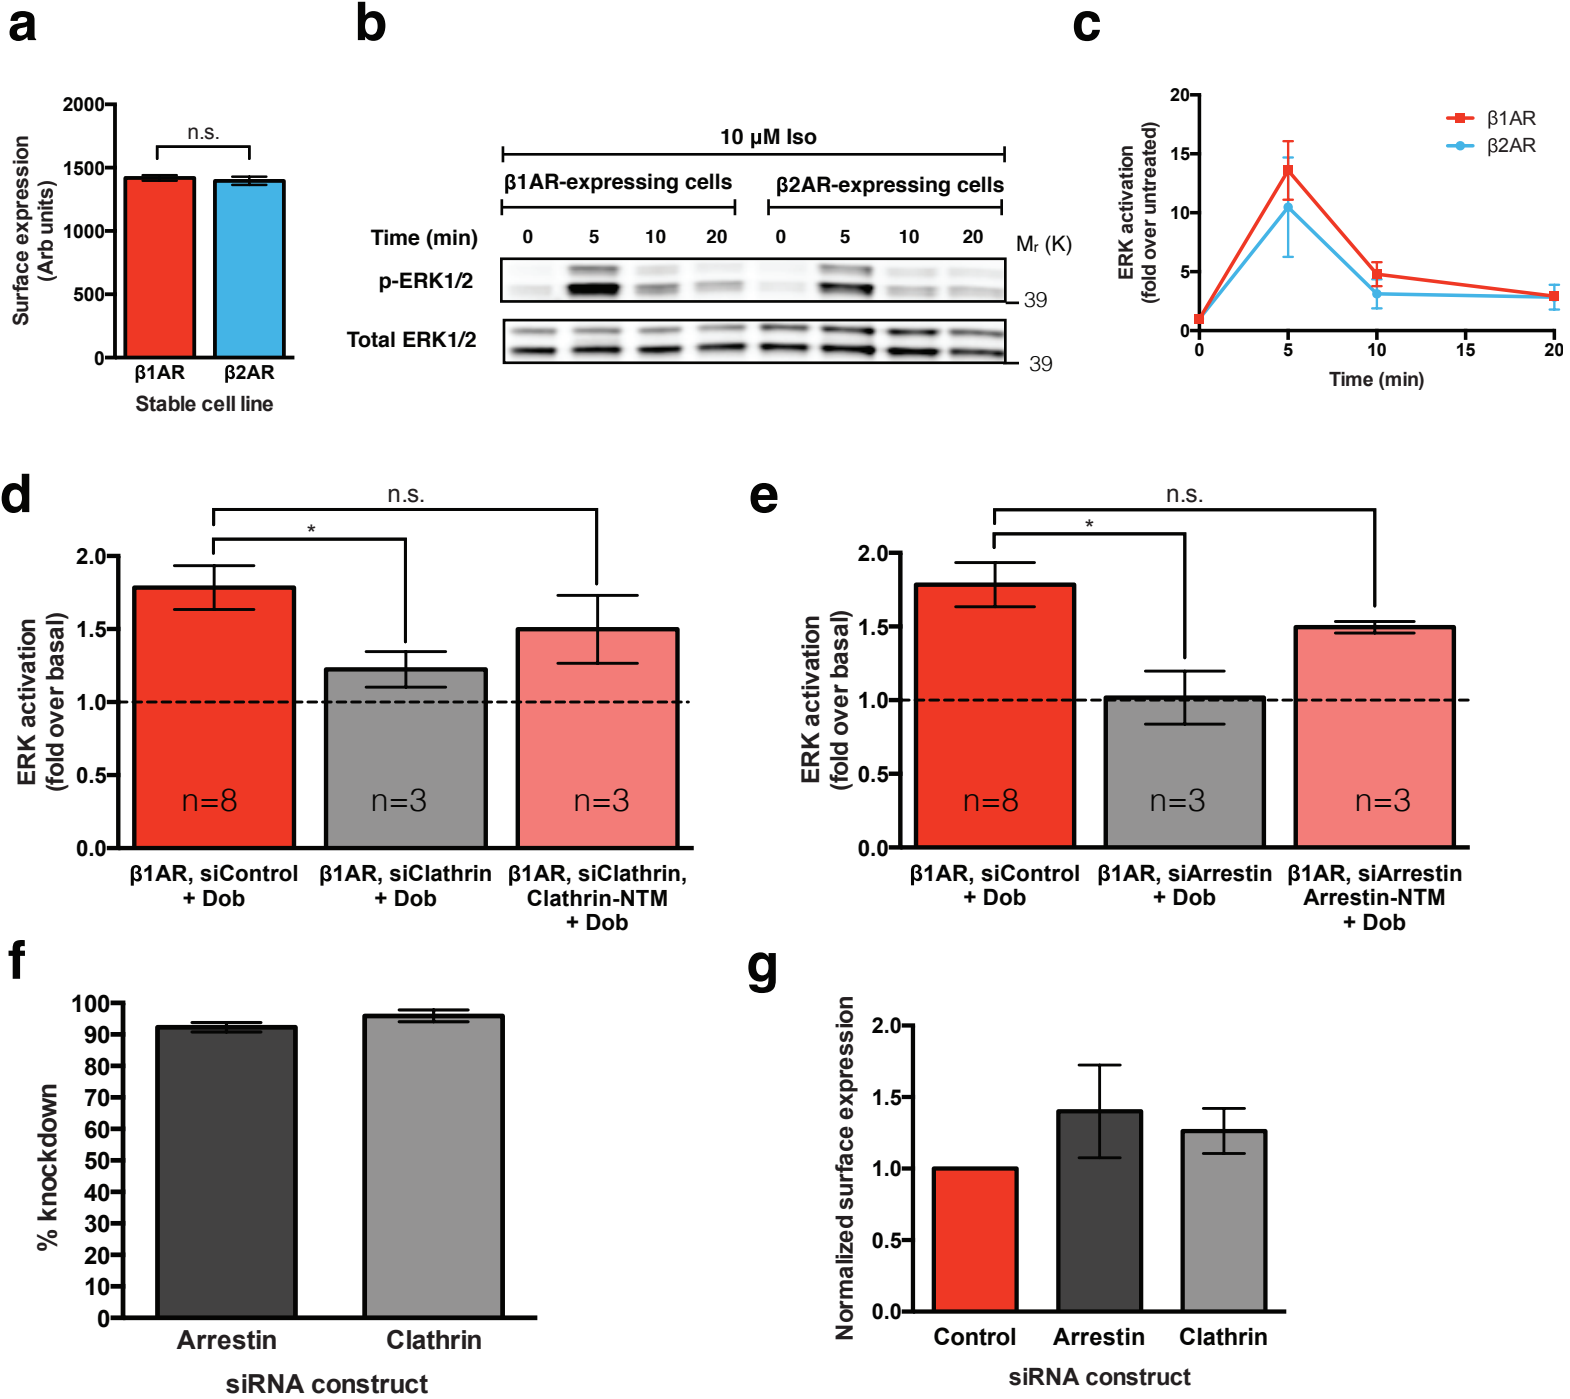

Supplement: NIHMS749198-supplement-2.pdf [file NIHMS749198-supplement-2.pdf]

# Supplementary Figure 2

**a**

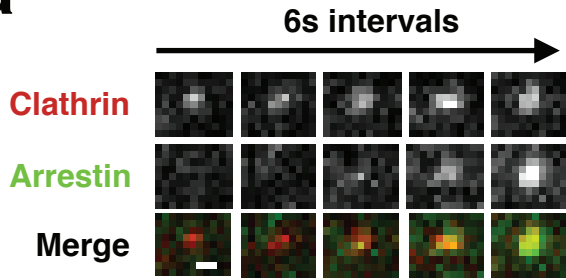

**b**

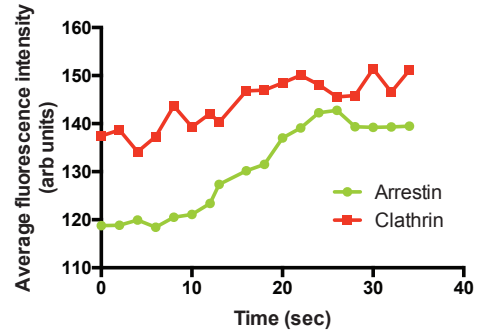

**c**

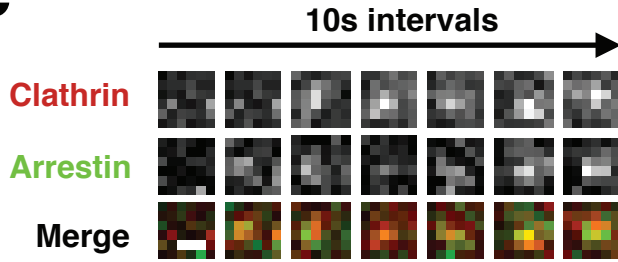

**d**

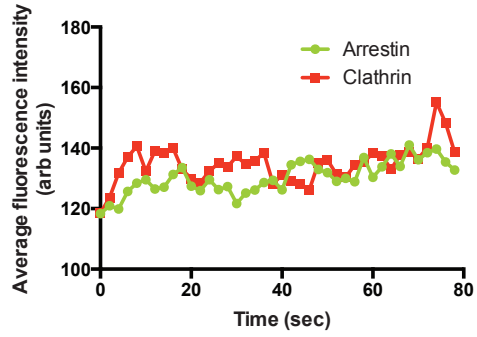

**e**

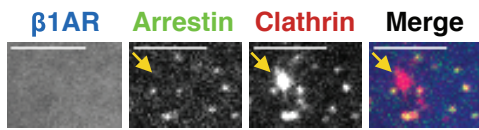

**f**

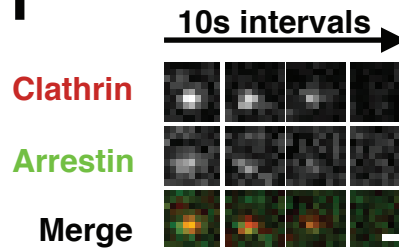

**g**

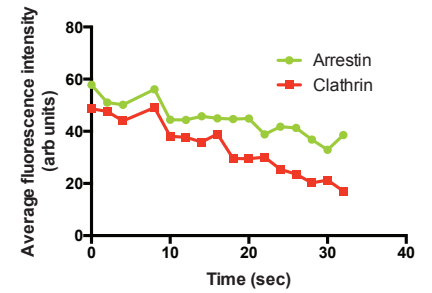

Supplement: NIHMS749198-supplement-3.pdf [file NIHMS749198-supplement-3.pdf]

# Supplementary Figure 3

**a**

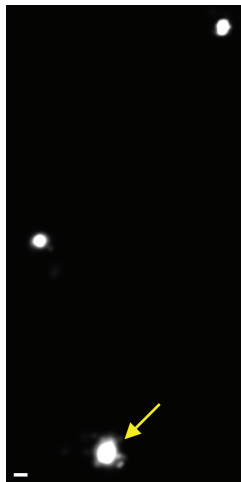

**b**

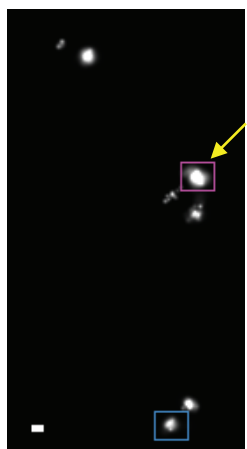

**c**

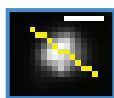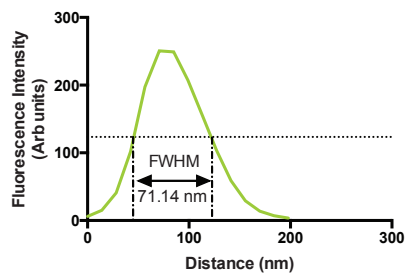

**d**

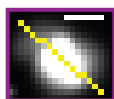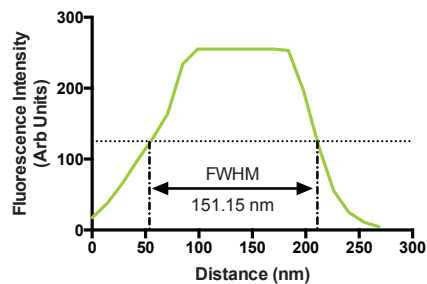

**e**

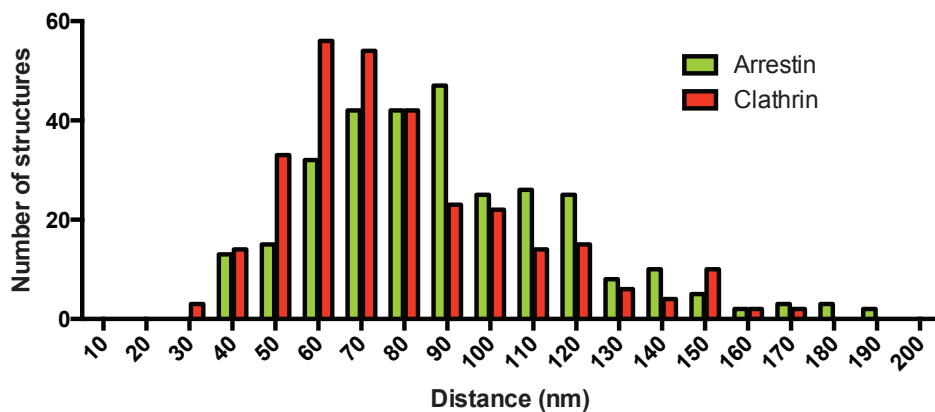

**f**

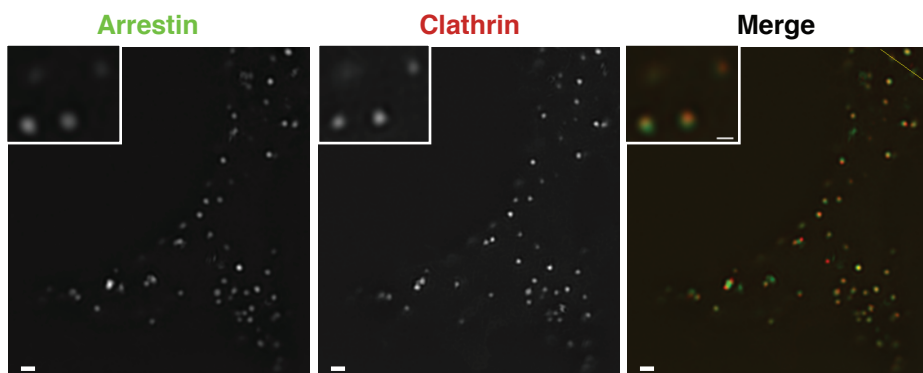

**g**

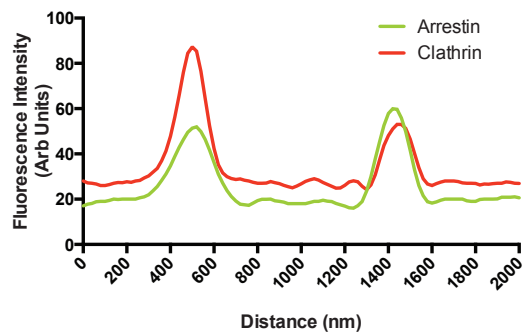

**h**

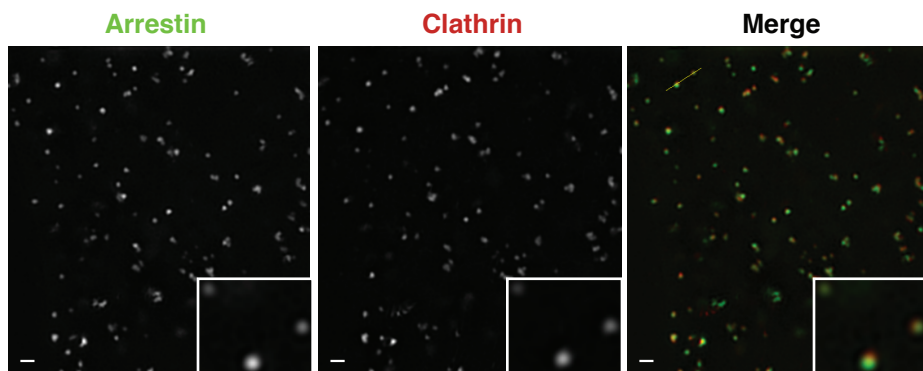

**i**

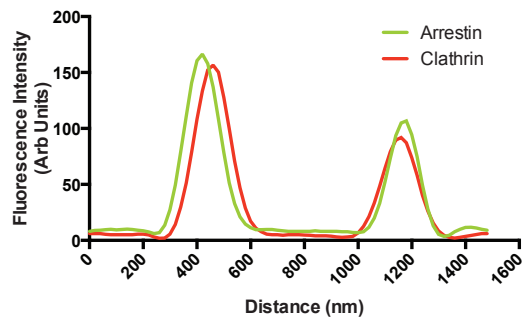

Supplement: NIHMS749198-supplement-4.pdf [file NIHMS749198-supplement-4.pdf]

# Supplementary Figure 4

**a**

Photobleach  
(10 s)

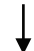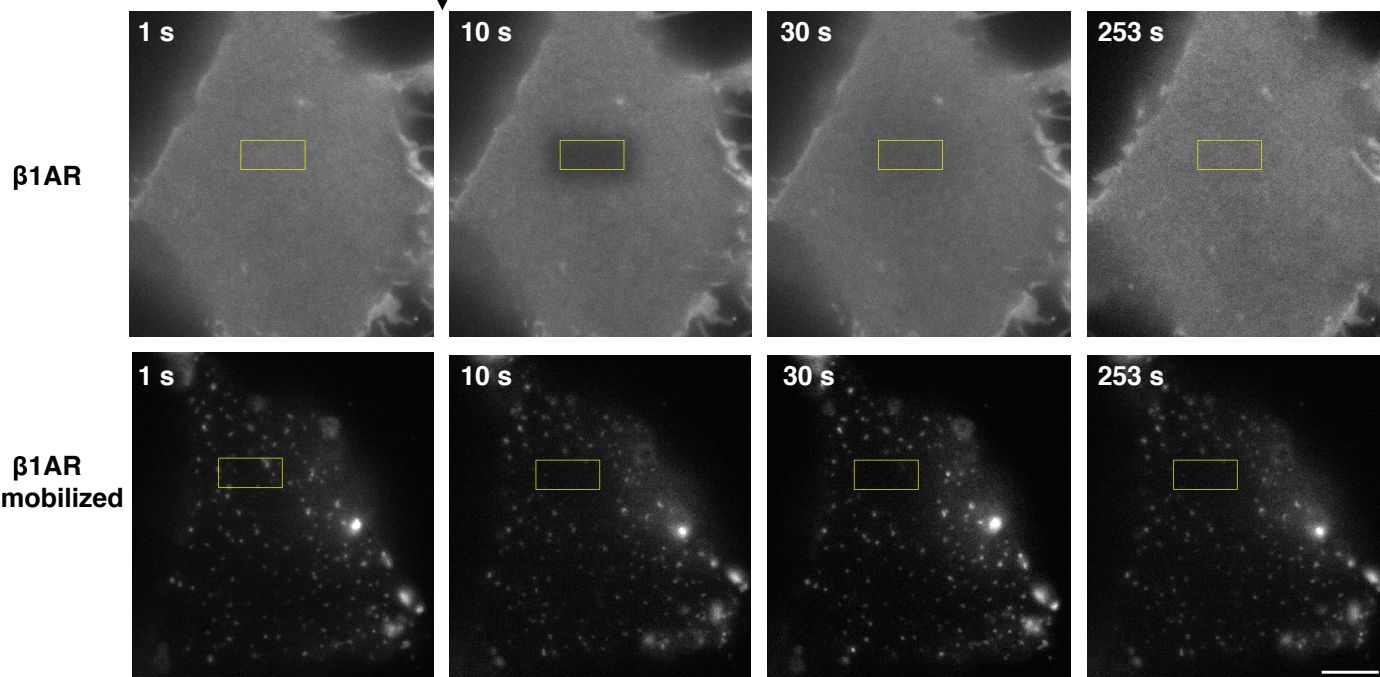

**b**

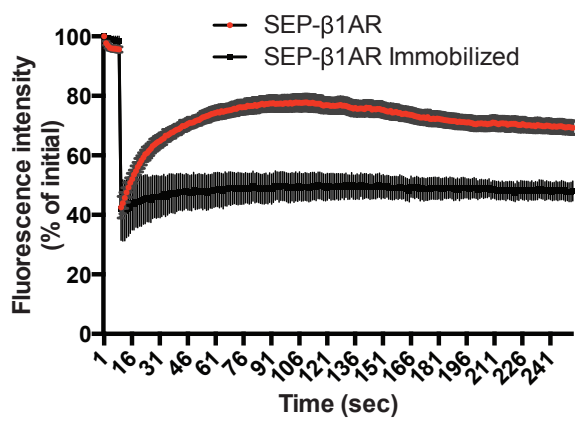

Supplement: NIHMS749198-supplement-5.pdf [file NIHMS749198-supplement-5.pdf]

# Supplementary Figure 5

**a**

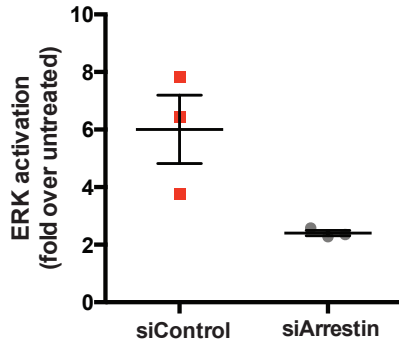

**b**

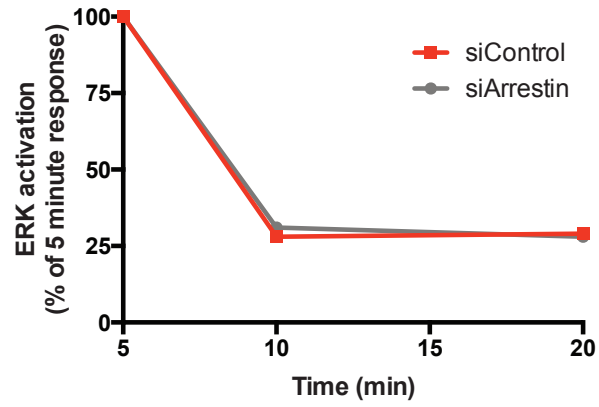

**c**

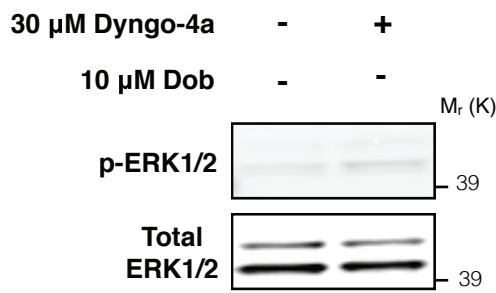

**d**

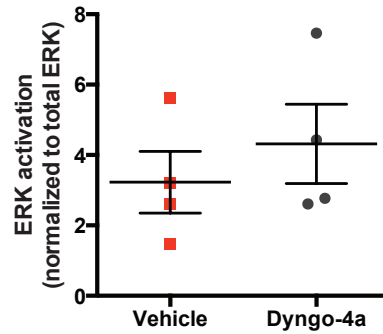

**e**

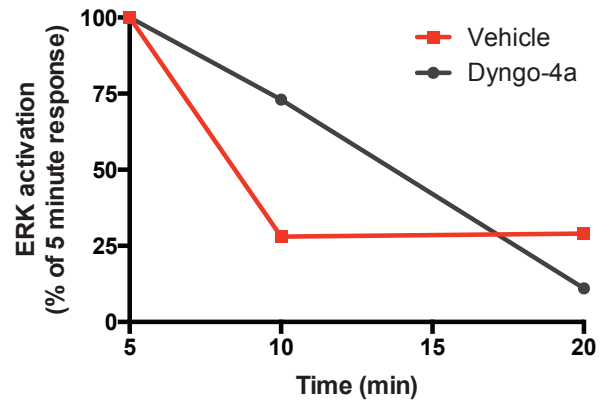

**f**

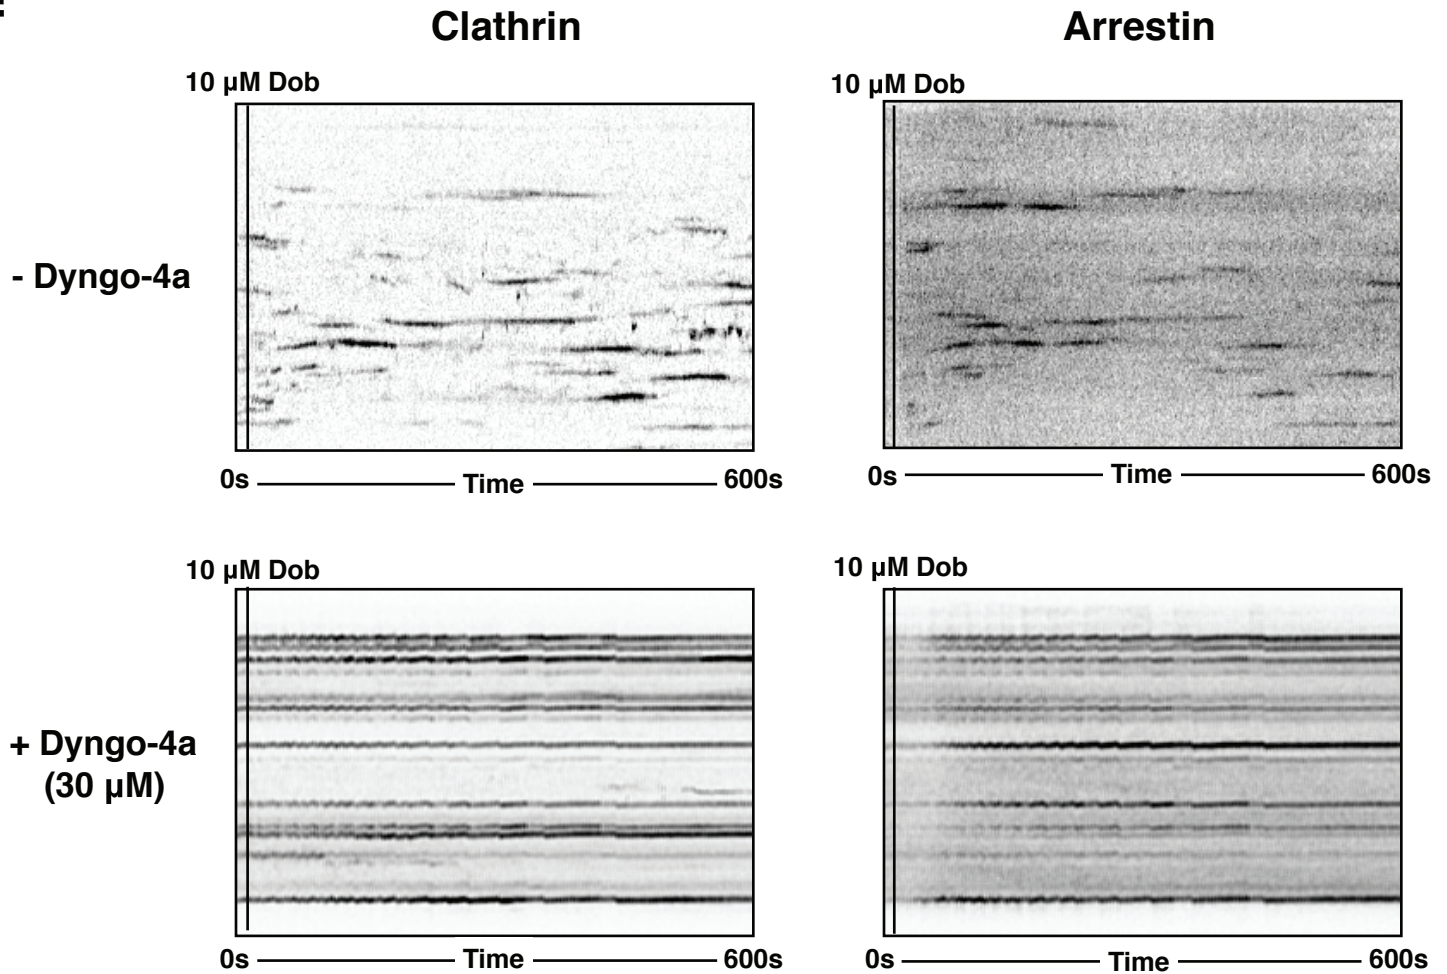

Supplement: NIHMS749198-supplement-6.pdf [file NIHMS749198-supplement-6.pdf]
